# Supplementary material
Source: Springer Nature journal article supplement (https://www.springermedizin.de/resource/supplementary/12885_2013_4058_MOESM1_ESM.pdf/9465122)
Supplement: MOESM1 [file 9465122]

**Patient with a rectal cancer TxN+ or T3/T4 of the mid or lower rectum treated by a neoadjuvant radiochemotherapy with 45 Gy  $\pm$  5 Gy local + 5FU**

**Inclusion and exclusion criteria verification**

**Inclusion & Randomization**

**Groupe S7**

Delay : 7 weeks  $\pm$  5 days

**Groupe S11**

Delay : 11 weeks  $\pm$  5 days

**Interval of 7 weeks**

**Interval of 11 weeks**

**Clinical evaluation of the response (*Rectal digital examination +/- (MRI)*)  
Surgery: curative resection with total mesorectal excision**

**Histological exam :**

- Complete pathological response (ypT0N0)
- Quality of the mesorectum

- Mortality rate (D90) and postoperative morbidity (D90)
- R0 resection rate, sphincter conservation rate

**Follow-up M1 - M3**

- Stoma closure
- Adjuvant chemotherapy
- Late morbidity

**Oncological Follow-up M6 - M60**

- Local and distant recurrences
- Overall and disease free survival

**END OF THE TRIAL**
